# Supplementary material
Source: publisher site journal article supplement (https://www.dovepress.com/article/511803)
Supplement: Supplementary file 1 [file get_supplementary_file.php]

Supplementary Table 1: Comprehensive Analysis of VRVFT Studies

| Reference | Type of Study | Inclusion | VR Tech | SAP | Benefits | Drawbacks | Study Quality |
| --- | --- | --- | --- | --- | --- | --- | --- |
| Stapelfeldt et al., 20217 | Prospective cohort | 36 healthy patients + 34 glaucoma patients | Oculus Quest VR headset (Facebook Technologies, LLC, Bern, Switzerland) + clicker for participant response feedback | Octopus 900 (Haag-Streit, Köniz, Switzerland) | Comparable perimetry parameters when comparing VR perimetry to Octopus 900. VR perimeter more portable and more accessible than Octopus 900. Mean defect comparison of Octopus 900 and the VR perimetry system using Spearman’s ranked correlation showed good agreement between both device measurements with ρ being larger than 0.7 for all and glaucomatous subjects. Longer VR testing time for healthy patients but not for glaucoma patients. | The VR system was found to slightly underestimate VF defects in glaucoma subjects (1.4 dB). Proposed VR system has limited luminance range that does not allow advanced losses to be measured as accurately as in SAP. VR perimetry requires calibration of screen luminosity, which may be affected by various internal and external factors (i.e., device temperature, battery level, etc.). This may induce additional noise into measurements. | Single center study. Current clinical study did not investigate the test-retest variability as well as the diagnostic utility of the proposed system, which are important metrics in assessing perimetry performance. |
| Wong et al., 202313 | Prospective observational proof-of-concept | 10 glaucoma patients | VR headset with Perispace v1.1 algorithm | Humphrey Field Analyzer (HFA; Carl Zeiss Meditec, Jena, Germany) | VR perimetry in metaverse environment demonstrates good overall agreement, pointwise concordance, and topographic map concordance when compared with HFA 24-2 Swedish interactive threshold algorithm (SITA)-fast perimetry test. VR perimetry in metaverse environment allows automation of operator requirements which decentralizes availability of crucial functional vision testing into out-of-hospital settings to overcome the limitations of physical space and infectious disease transmission risk in hospital settings. | - | Small cohort with no control group. |
| Heinzman et al., 20238 | Prospective cohort | 20 healthy patients + 9 glaucoma patients | Iowa Head-Mounted Display (HMD) Open-Source Perimeter; Samsung Galaxy S9 smartphone (Samsung Electronics Co., Suwon, South Korea) + second-generation Google Daydream View VR headset | Octopus 900 | VR perimetry with the HMD is highly repeatable with excellent pointwise agreement with Octopus 900. VR perimetry can be performed with inexpensive hardware (using the Open Perimetry Interface) at around 3% the cost of the Octopus 900. VR perimetry is portable and has potential to decrease barriers to VF testing and protect sight by increasing access to early detection of degenerative eye diseases. Patients preferred testing on the HMD compared to Octopus 900 due to increased comfort and ease of use. | The floor effect (the level below which further disease-related changes become undetectable) in this device prevents distinguishing locations with poor sensitivity from those that are perimetrically blind. The device tested has no eye tracking, so it is impossible to determine whether the increased retest variability in the periphery in glaucoma subjects was associated with fixation drift or headset positioning. | Single center study that is limited in scope to assessment of the dynamic range, retest variability of the HMD, and the pointwise threshold comparison to the Octopus 900. Study did not evaluate sensitivity or specificity for the detection of VF defects or their progression. |
| McLaughlin et al., 20249 | Prospective cohort | 10 healthy patients + 11 glaucoma patients | VRVF device (Virtual Vision) | HFA 3 | Sequential unassisted, home-administered VRVFTs were reliable (similar findings from one test to another), accurate (in good agreement with SAP), and acceptable (easy and comfortable usability by the test-taker). VRVF testing has greater flexibility in both time and location of testing with automated auditory and written instructions. | VRVFT environments are not as consistent at home as they are in the clinic, which may impact examination results. The nasal values were on average 2– 4 decibels lower when testing on the VRVF device than with SAP. VRVF’s maximum stimuli luminance and background luminance are dimmer than that of SAP, as a result, the contrast between the stimuli and background may vary between the two devices, potentially explaining the lower light sensitivity values on the VRVFT. Practice of telemedicine may be limited systemically by licensing, access to proper technology, disabilities, and testing sensitivity. | Healthy patients were, on average, 12 years older than glaucoma group. Testing of controls was done 1 year prior to testing of glaucoma patients. Test-retest reproducibility in diseased group was superior compared to non-diseased group. Lack of liners and antifog spray for healthy patients may confound test results and comparisons to glaucoma patients, which tested on devices with liners and antifog spray. This study analyzed their findings using mean sensitivity, which does not convey spatial information or variability. Enhanced supervision may be necessary in old or young age, low education status, and history of poor test-taking. |
| Chia et al., 202410 | Cross-sectional | 21 glaucoma patients | Oculus Go, Facebook. Vivid Vision Perimetry (VVP, Vivid Vision Inc) | HFA | Results correlated well with SAP in eyes with moderate-to-severe VF loss from glaucoma. At-home VRVFT circumvents challenges with conventional perimetry long clinic wait times, the need to schedule appointments and travel to the clinic, and significant clinic infrastructure requirements and resources. VRVFT has low test-retest variability. Patients feel more involved in their healthcare via at-home VR perimetry. | HFA and VVP-10 VRVFT were similarly uncomfortable and fatiguing. VVP-10 multifaction perimetry combined with weight of VR headset precludes those with limited neck mobility from completing the test. VRVFT time per eye per session was also roughly double that of HFA testing. VVP-10 fraction seen has a roughly linear relationship with HFA MS, the relationship is only meaningful for points within the range of approximately 5 to 25 dB and for eyes with significant glaucoma. | Single center study. 10-session testing regimen made it possible to compute reliability of a single (multisession) VF test from the standard error across the sessions. Subjects required only 1 training session (by inexperienced trainer) which indicates the practical application and feasibility of remote training, although mean age of study population was 62.2 years (young compared to most glaucoma patients). All subjects identified as either White or Asian. |
| Narang et al., 202217 | Prospective, cross-sectional, observational | 66 glaucoma patients + 10 glaucoma suspect patients | Advanced vision analyzer (AVA; Elisar Vision Technology) | HFA | Adequate equivalence between AVA and HFA because threshold estimates of AVA strongly correlate with HFA for 10-2 program. For diagnostic purposes, the mean difference and mean sensitivity results of both the devices are comparable and similar. AVA allows perimetry in clinics and home-based settings, as well as in individuals who are remotely located, thereby increasing access to care. | Area under curve for mean sensitivity was higher for HFA and a consistent difference was found in the shape of curve, where the values for AVA trended marginally lower. Global analyses may not be as sensitive as pointwise analyses for early damage because small changes in dB values may not be reflected in the averaging data across the VF. VR headset is flat and can result in stimulus aberration. AVA had longer test times compared to HFA. | Mean age of the control group was 41.7 years, mean age of the glaucoma group was 61.1, and the mean age of the glaucoma suspects was 51.4 years. Authors state their algorithm accurately detects VF defects even in cases with lower sensitivity values. |
| Greenfield et al., 202111 | Cross-sectional | 7 glaucoma patients + 5 glaucoma suspect patients | VVP | HFA + spectral-domain optical coherence tomography (OCT) | VVP Swift test can generate reproducible results and is comparable with SAP. Average mean sensitivity measurements obtained with VVP Swift demonstrated reliability through a statistically significant association with mean difference measurements from the HFA. VVP Swift measurements of VFs were found to be associated with the structural measurements of OCT imaging, and was comparable with association between HFA and OCT. VVP Swift test duration significantly shorter than HFA. | VVP Swift demonstrated decreasing precision with increased VF damage. | No control group. Study had small and nonuniform sample size that hindered meaningful statistical analyses. Study focused on VVP Swift’s ability to perform clinic-based examinations in presence of a skilled technician; outcomes from home-based assessment may differ. In some cases, change in disease progression may have occurred over time, thereby causing bias. Analysis of reproducibility between VVP Swift and HFA examinations was hampered by nonstandardized output statistics between the 2 devices. Thus, no conversion of mean sensitivity between devices was possible, and a correlation was determined to be the best available statistical measure. |
| Shetty et al., 202218 | Prospective cross-sectional | 40 healthy patients + 57 glaucoma patients | Palm Scan VF2000 (Micro Medical Devices) | HFA | Sensitivity and positive predictive value for identifying glaucoma with Palm Scan were 100%. Sensitivity and specificity observed was better compared with that of OCT for classification of eyes as glaucomatous or non-glaucomatous. Palm Scan is portable, battery operated, and does not require a dedicated dark room or the eye to be occluded. It is more practical to use in children and those with disabilities, in nursing homes, and in hospitals that can’t use SAP testing. | Low sensitivity, specificity, PPV, and NPV for detecting severity of glaucoma. Can only be used as a screening tool as of now. | Agreement was best for classification of glaucoma as mild or severe; however, the agreement was not good for classification cut-off at mild or moderate, and moderate or severe. Patients who came to clinic are more likely to adhere to all instructions during these tests, which may influence the test results when compared to home- or community-based settings. |
| Soans et al., 202112 | Prospective observational case series | 21 healthy patients + 15 glaucoma patients + 17 neuro-ophthalmic disorder patients | FOVE0 (Fove Inc., Tokyo, Japan) VR head-mounted device (HMD) | HFA 3 + Tobii T120 (Tobii Technology, Stockholm, Sweden) screen-based eye tracker | Participants in each group prefer the VR setup in almost all the dimensions of user experience. VRVFT able to identify and distinguish patients with glaucomatous and neuro-ophthalmic defects from controls based on their oculomotor characteristics. Spatio-temporal properties obtained through VRVFT method is similar across screen-based eye tracker and VR setups, with the latter performing better. | Eye-tracking on HMD technology is currently inferior to research-grade eye trackers in terms of tech specifications. | SAP is compared to VRVFT only in terms of user experience. Number of participants in study was relatively small (for machine-learning approaches). |
| Narang et al., 202114 | Prospective, cross-sectional, observational case series | 85 healthy patients + 75 glaucoma patients | AVA | HFA | There is substantial equivalence between the AVA (using Elisar Standard Algorithm) and HFA (SITA Standard). Test-retest variability and blind spot location accuracy of AVA was comparable with that of HFA, and no lens–rim artifact was detected. AVA can be used in rural areas of developing countries where patients do not have direct access to tertiary care hospitals. AVA allows perimetry testing with adequate physical distance, and patient can perform tests while wearing a facemask. AVA allows eye-tracking and has a cloud-based storage system that allows data backup. | AVA does not have an active eye-tracking system, and may be unreliable in individuals with abnormal and eccentric pupils. | Testing done with very specific population. Mean age of healthy participants was 38.21 years and was 56.72 years for glaucoma participants. |
| Montelongo et al., 202115 | Prospective observational case series | 3 healthy patients | VisuALL VR headset | T-24 protocol (HFA 24-2 equivalent) | VisuALL has two displays (one for each eye) allowing it to test both eyes simultaneously but separately with similar test duration to other perimeters. This device’s portability may contribute to increased efficiency in a typical ophthalmology practice; multiple test subjects can be assessed simultaneously using the same server in a single, well compartmentalized room, by a single technician. VRVFT provides more options for providers to reach marginalized and underserved communities, as it does not require a specific testing location, and therefore may enhance healthcare access and outcomes. | - | Single center study and small sample size. False positive responses occurred with frequency of zero in each eye of one participant, 0.97% in the right eye of the second participant and 3.45% in the left eye, and 2.3% in the right and left eyes of the third participant. |
| Sayed et al., 202019 | Prospective case series | 23 glaucoma patients | HTC Vive (Xindian District, New Taipei City, Taiwan) | HFA | The diagnostic monocular VF testing algorithm was comparable to SAP determination of threshold sensitivity based on point by point assessment. Compared to traditional methods, DSpecs eliminates the need for precise eye positioning and calibration. Dspecs stands out as the only known visual aid that can both diagnose VF defects and personalize a corrective profile based on each patient’s specific needs. | Patients with minor peripheral defects and severe VF defects did not see a significant improvement. | Patients had their most recent HFA VF test compared to Dspecs VF test. Patient factors such as their level of understanding of the test processes or familiarity with the VR headset could influence their self-reported responses. |
| Sayed et al., 202020 | Prospective case series | 20 patients with known binocular VF defects | HTC Vive | HFA | Diagnostic binocular VF testing with Dspecs was comparable to integrated monocular SAP based on point by point assessment. Using Dspecs during binocular VF testing is an improvement over the standard Esterman method, which might underestimate visual field limitations, especially in the upper visual field. | The VR headset is bulky and isolates patients from their surroundings. | Small sample size. Study objective was to augment VF for patients with VF defects. |
| Tsapakis et al., 201821 | Prospective case series | 10 glaucoma patients | PC Monitor or VR Glasses | HFA | VRVFT is a low cost and easy to use way to screen for glaucoma without needing any specialized equipment. Takes about 2-3 min per eye. Has the ability to check room luminosity which can affect visual field testing. Reliable in detecting glaucoma in comparison to HFA. | Most patients who have glaucoma are in their 70s and 80s and may have difficulty operating this technology. | Small sample size. Intended for screening patients rather than tracking progression of diagnosed glaucoma. |
| Tsapakis et al., 201722 | Prospective case series | 10 glaucoma patients | Trust EXOS 3D VR glasses + Alcatel One Touch Pixi 4 8050D smartphone with 6 inch display | HFA 2 | The mean difference values and correlation coefficient (in all tests) between VRVFT and HFA were statistically significant. VR headset is easy to use and has comfortable patient positioning; patients tolerated test well and fixation losses occurred rarely. VRVFT is low cost and portable. Patient can use their glasses with this VR headset and software. | - | Small sample size. Comparison of VRVFT against HFA 2. Authors stated that further trials were necessary in order to fully evaluate this device relative to SAP. |
| Wroblewski et al., 201423 | Proof-of-concept | 17 healthy patients + 30 glaucoma patients + 6 glaucoma suspect patients + 9 patients with other neuroophthalmological diagnoses | Binocular ViewPoint Eye Tracker (Arrington Research, Scottsdale, AZ, USA) + eMagin (Bellevue, WA, USA) SVGA XL monochrome (green) OLED display | HFA 2 | VirtualEye has ability to test VF in both standard manual and visual grasp modes in a manner comparable to HFA. Test-retest variability is similar to that obtained with HFA II (SITA), with only major difference being a systematic shift (about −5 dB) of VirtualEye sensitivities. VirtualEye headset was more comfortable and easier to use than HFA. VRVFT may provide testing to those with compromised access to, or limited abilities in, using SAP. | The VirtualEye tests in visual grasp mode often indicated poor fixation and/or excessive number of false positives or false negatives (15% of eyes). Longer test time and decreased familiarity when compared to HFA. | Point-by-point comparison of VRVFT against HFA 2. Visual grasp mode was usually performed at end of perimetry session, patient fatigue may have played a role in fixation losses. Tests were not randomly ordered and may result in superior performance for earlier testing, favoring SAP, then manual mode with VirtualEye, and finally with visual grasp mode with VirtualEye. |

Supplementary Table 2: Characteristics and Findings of Studies Evaluating Virtual Reality Visual Field Testing

| **Study Characteristic** | **Number of Studies** | **Key Findings** |
| --- | --- | --- |
| Prospective Cohort | 3 | Demonstrated good correlation with SAP |
| Cross-sectional | 4 | Validated testing protocols |
| Proof-of-concept | 2 | Established technical feasibility |
| Case Series | 7 | Reported patient outcomes |
| **Technology Type** | | |
| Dedicated VR System | 8 | Higher precision, costlier |
| Adapted Commercial | 6 | More accessible, variable results |
| Mixed Systems | 2 | Compared multiple approaches |

Supplementary Table 3: Benefits and Drawbacks of Virtual Reality Visual Field Testing

| **Category** | **Benefits** | **Drawback** |
| --- | --- | --- |
| Clinical Performance | Good agreement with SAP; Reproducible results; Potential for shorter testing time | Variable precision in advanced cases; Limited luminance range |
| Accessibility | Portable; Remote testing capability; Lower space requirements | Technology access barriers; Need for standardized protocols |
| Patient Factors | Improved comfort; Intuitive interface; Reduced infection risk | Technology adaptation challenges; Fatigue from head movement |
| Implementation | Cost-effective; Resource optimization; Cloud data storage | Staff training requirements; Variable testing conditions |
